# Supplementary material for: Different conjugated system Zn(ii) Schiff base complexes: supramolecular structure, luminescent properties, and applications in the PMMA-doped hybrid materials
Source: Royal Society of Chemistry journal article supplement (doi:10.1039/c6dt04159k), 2016-12-24
Supplement: c6dt04159k1.pdf [file c6dt04159k1.pdf]

## Supporting Information

### Different Conjugated System Zn(II) Schiff Base Complexes: Supramolecular Structure, Luminescent Properties and Application in PMMA-Doped Hybrid Material

Yu-Wei Dong, Rui-Qing Fan,\* Wei Chen, Hui-Jie Zhang, Yang Song, Xi Du, Ping Wang, Li-Guo Wei, and Yu-Lin Yang,\*

MIIT Key Laboratory of Critical Materials Technology for New Energy Conversion and Storage, School of Chemistry and Chemical Engineering, Harbin Institute of Technology, Harbin 150001 (P. R. China)

E-mail: fanruiqing@hit.edu.cn and ylyang@hit.edu.cn

### Index

|            | Content                                                                                                                                                                                                                  | Page No. |
|------------|--------------------------------------------------------------------------------------------------------------------------------------------------------------------------------------------------------------------------|----------|
| Figure S1  | IR spectra of the free ligand <b>L</b> <sup>1</sup> and complex <b>Zn1</b> in KBr disks.                                                                                                                                 | 1        |
| Figure S2  | IR spectra of the free ligand <b>L</b> <sup>2</sup> and complex <b>Zn2</b> in KBr disks.                                                                                                                                 | 1        |
| Figure S3  | IR spectra of the free ligand <b>L</b> <sup>3</sup> and complex <b>Zn3</b> in KBr disks.                                                                                                                                 | 2        |
| Figure S4  | IR spectra of the free ligand <b>L</b> <sup>4</sup> and complex <b>Zn4</b> in KBr disks.                                                                                                                                 | 2        |
| Figure S5  | IR spectra of the free ligand <b>L</b> <sup>5</sup> and complex <b>Zn5</b> in KBr disks.                                                                                                                                 | 3        |
| Figure S6  | <sup>1</sup> H NMR spectra of the free ligand <b>L</b> <sup>1</sup> and complex <b>Zn1</b> in CDCl <sub>3</sub> .                                                                                                        | 3        |
| Figure S7  | <sup>1</sup> H NMR spectra of the free ligand <b>L</b> <sup>2</sup> and complex <b>Zn2</b> in CDCl <sub>3</sub> .                                                                                                        | 4        |
| Figure S8  | <sup>1</sup> H NMR spectra of the free ligand <b>L</b> <sup>3</sup> and complex <b>Zn3</b> in CDCl <sub>3</sub> .                                                                                                        | 4        |
| Figure S9  | <sup>1</sup> H NMR spectra of the free ligand <b>L</b> <sup>4</sup> and complex <b>Zn4</b> in CDCl <sub>3</sub> .                                                                                                        | 5        |
| Figure S10 | <sup>1</sup> H NMR spectra of the free ligand <b>L</b> <sup>5</sup> and complex <b>Zn5</b> in CDCl <sub>3</sub> .                                                                                                        | 5        |
| Figure S11 | <sup>13</sup> C NMR spectra of the free ligand <b>L</b> <sup>1</sup> and complex <b>Zn1</b> in CDCl <sub>3</sub> .                                                                                                       | 6        |
| Figure S12 | <sup>13</sup> C NMR spectra of the free ligand <b>L</b> <sup>2</sup> and complex <b>Zn2</b> in CDCl <sub>3</sub> .                                                                                                       | 6        |
| Figure S13 | <sup>13</sup> C NMR spectra of the free ligand <b>L</b> <sup>3</sup> and complex <b>Zn3</b> in CDCl <sub>3</sub> .                                                                                                       | 7        |
| Figure S14 | <sup>13</sup> C NMR spectra of the free ligand <b>L</b> <sup>4</sup> and complex <b>Zn4</b> in CDCl <sub>3</sub> .                                                                                                       | 7        |
| Figure S15 | <sup>13</sup> C NMR spectra of the free ligand <b>L</b> <sup>5</sup> and complex <b>Zn5</b> in CDCl <sub>3</sub> .                                                                                                       | 8        |
| Figure S16 | Experimental (top) and simulated (bottom) PXRD patterns of complexes <b>Zn1–Zn5</b> .                                                                                                                                    | 9        |
| Figure S17 | (a) Crystal structure of <b>Zn2</b> . Thermal ellipsoid is drawn at 50% probability. H atoms have been omitted for clarity. (b) The 3D network structure in <b>Zn2</b> . Dotted lines represent the C–H⋯Cl interactions. | 10       |
| Figure S18 | UV–vis absorption spectra of <b>L</b> <sup>1–L</sup> <sup>5</sup> in CH <sub>3</sub> CN at room temperature.                                                                                                             | 10       |
| Figure S19 | (a) Emission spectra of <b>L</b> <sup>1–L</sup> <sup>5</sup> in the solid state and (b) CIE                                                                                                                              | 11       |

---

|            |                                                                                                                                                                                                                     |    |
|------------|---------------------------------------------------------------------------------------------------------------------------------------------------------------------------------------------------------------------|----|
|            | chromaticity diagram (1931 CIE standard). (c) Emission spectra of <b>L<sup>1</sup>–L<sup>5</sup></b> in acetonitrile solution and (d) CIE chromaticity diagram.                                                     |    |
| Figure S20 | Emission energy spectra of <b>L<sup>1</sup>–L<sup>5</sup></b> in (a) acetonitrile solution and (b) the solid state. Emission energy spectra of <b>Zn1–Zn5</b> in (c) acetonitrile solution and (d) the solid state. | 12 |
| Figure S21 | IR spectra of pure PMMA, <b>Zn3</b> and <b>Zn3-PMMA</b> in KBr disks.                                                                                                                                               | 13 |
| Figure S22 | The comparison TG curves of pure PMMA, <b>Zn3</b> and <b>Zn3-PMMA</b> .                                                                                                                                             | 13 |
| Table S1   | Selected bond distances (Å) and angles (°) for <b>Zn1</b> and <b>Zn2</b> .                                                                                                                                          | 14 |
| Table S2   | Selected bond distances (Å) and angles (°) for <b>Zn3–Zn5</b> .                                                                                                                                                     | 14 |
| Table S3   | Analytical and physical data of the ligands <b>L<sup>1</sup>–L<sup>5</sup></b> and complexes <b>Zn1–Zn5</b> .                                                                                                       | 15 |
| Table S4   | The emission energy data of the ligands <b>L<sup>1</sup>–L<sup>5</sup></b> and complexes <b>Zn1–Zn5</b> in acetonitrile solution and the solid state at room temperature.                                           | 16 |
| Table S5   | The luminescence lifetimes of the ligands <b>L<sup>1</sup>–L<sup>5</sup></b> and complexes <b>Zn1–Zn5</b> in acetonitrile solution and the solid state at room temperature.                                         | 16 |

---

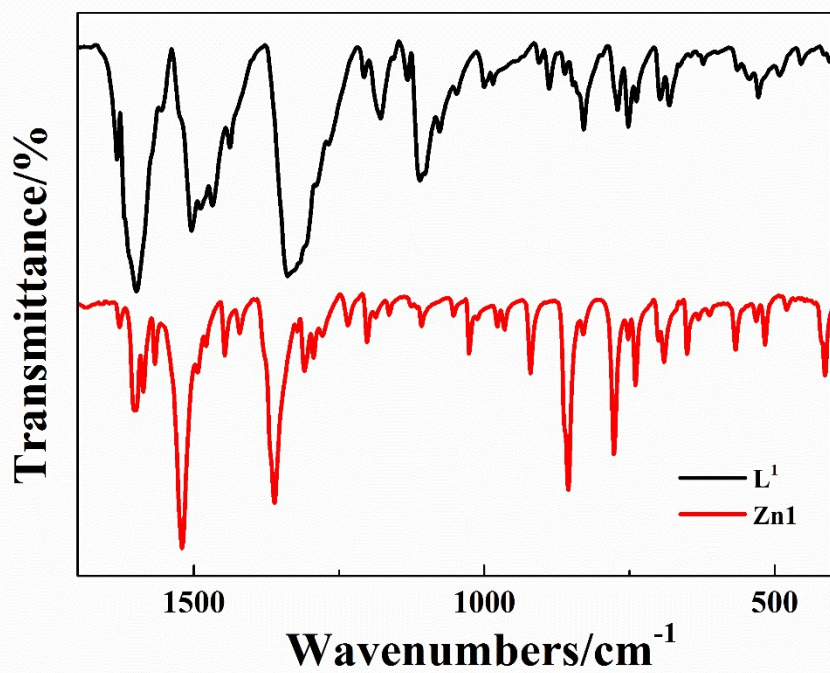

Figure S1. IR spectra of the free ligand L<sup>1</sup> and complex Zn1 in KBr disks.

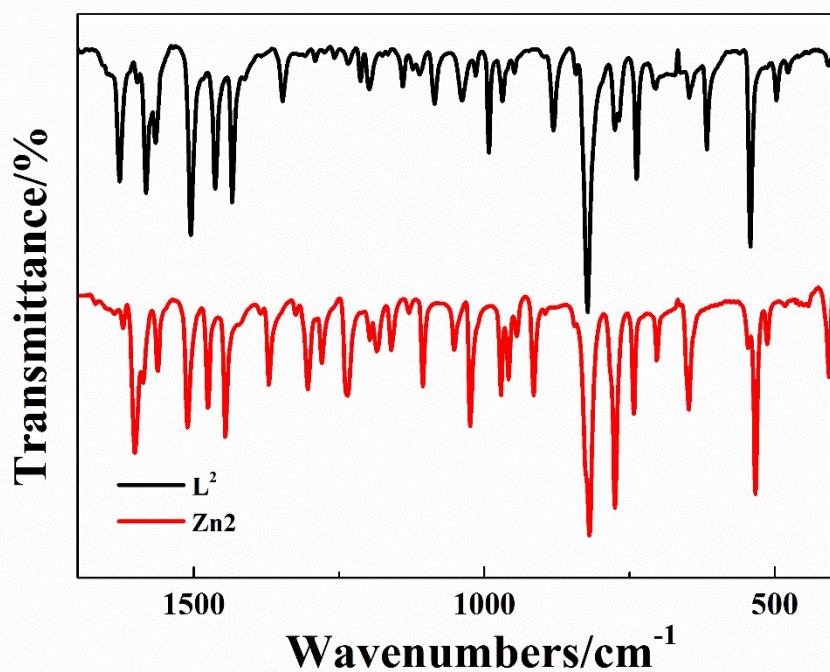

Figure S2. IR spectra of the free ligand L<sup>2</sup> and complex Zn2 in KBr disks.

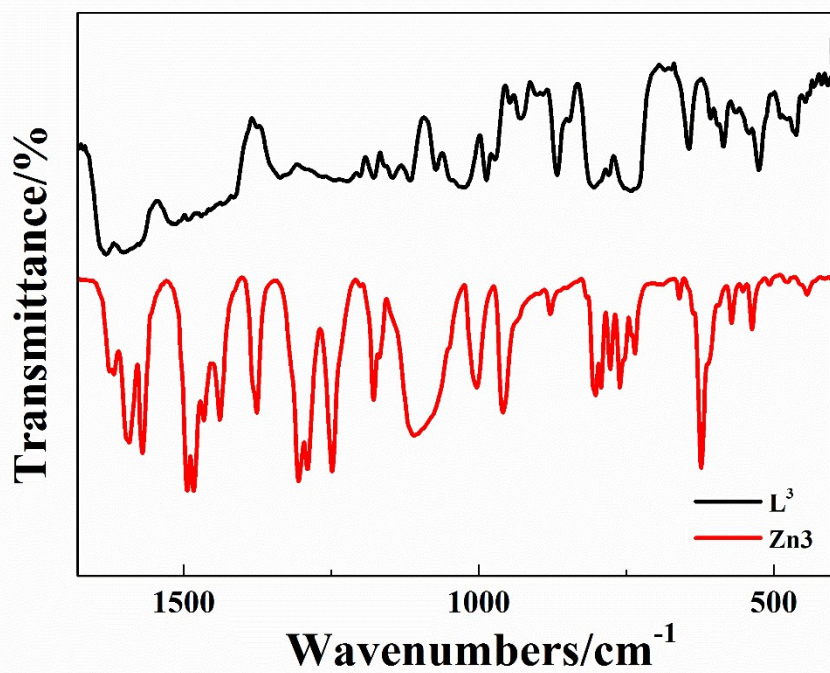

Figure S3. IR spectra of the free ligand L<sup>3</sup> and complex Zn<sub>3</sub> in KBr disks.

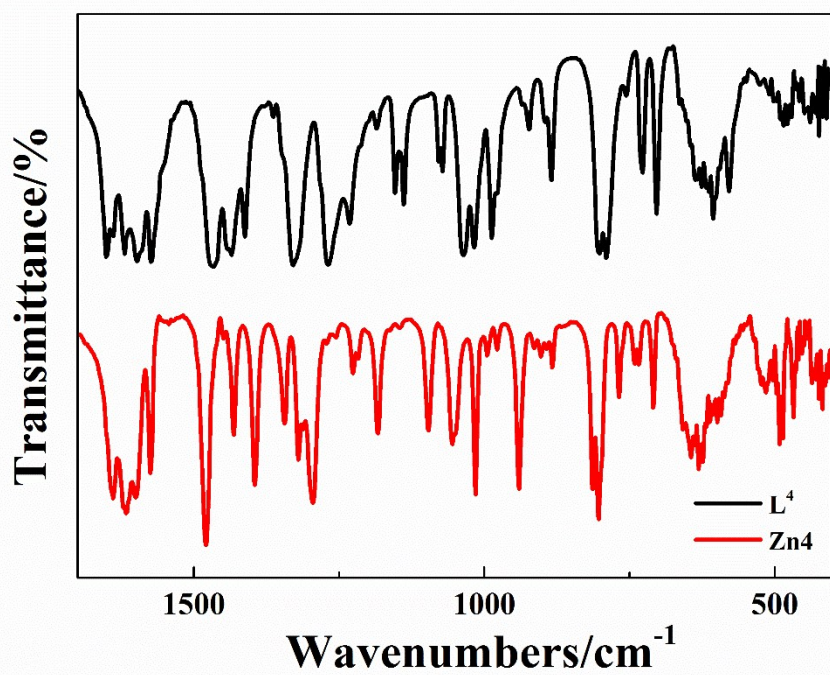

Figure S4. IR spectra of the free ligand L<sup>4</sup> and complex Zn<sub>4</sub> in KBr disks.



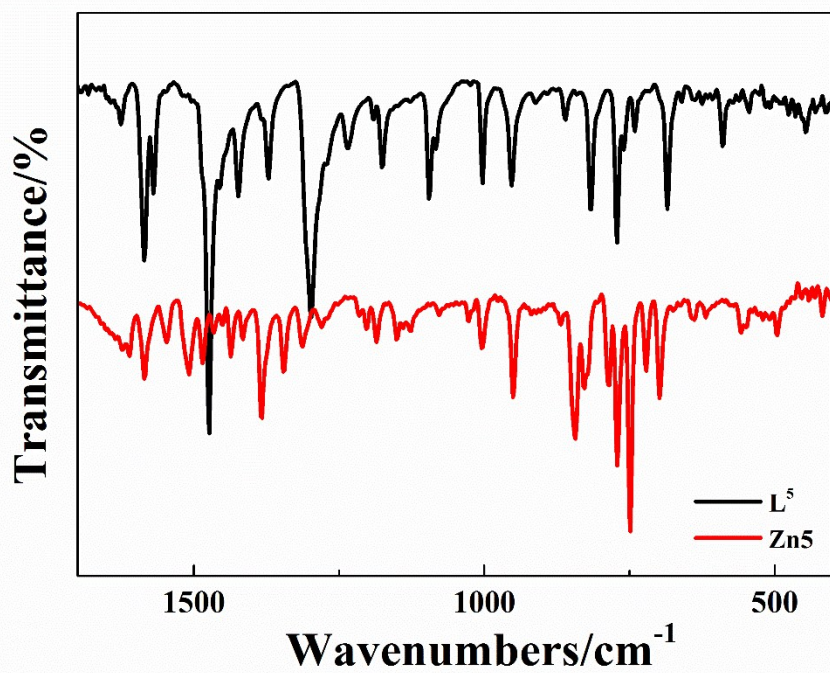

Figure S5. IR spectra of the free ligand L<sup>5</sup> and complex Zn5 in KBr disks.

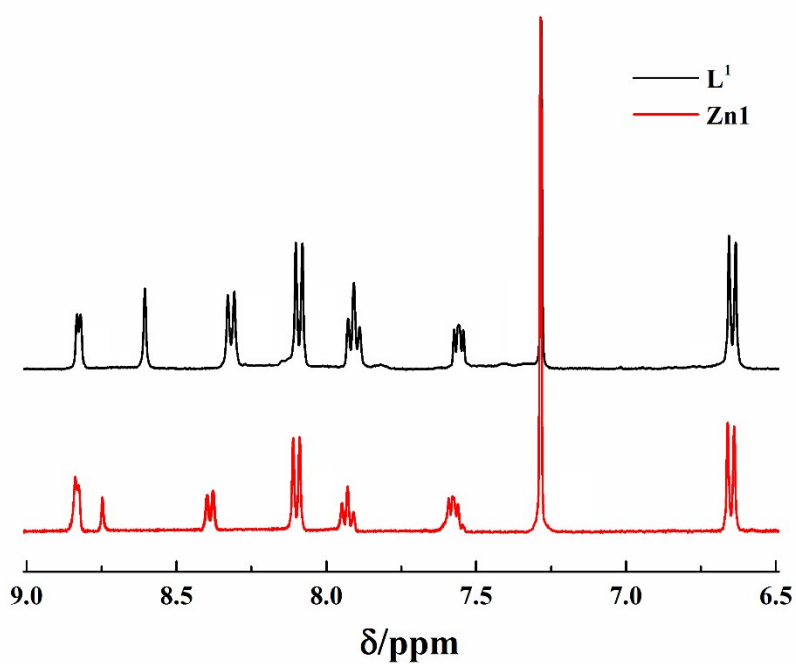

Figure S6. <sup>1</sup>H NMR spectra of the free ligand L<sup>1</sup> and complex Zn1 in CDCl<sub>3</sub>.

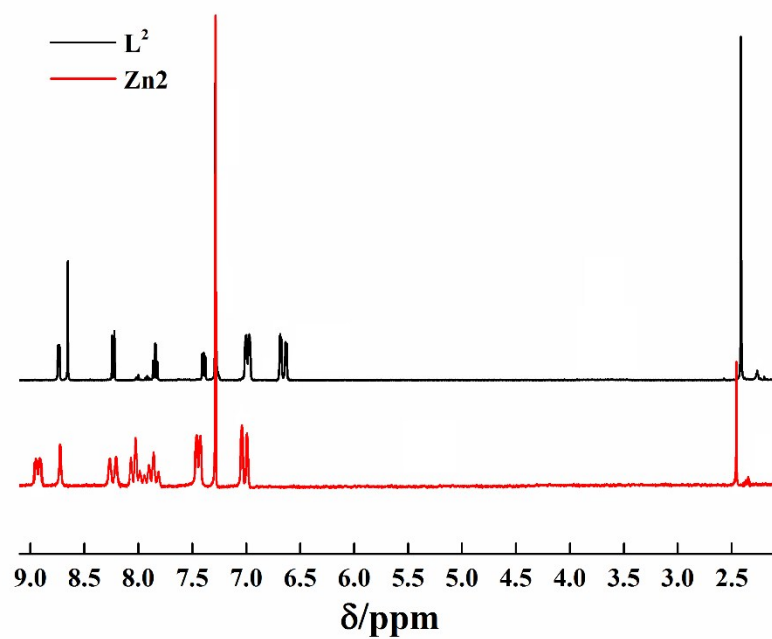

**Figure S7.** <sup>1</sup>H NMR spectra of the free ligand L<sup>2</sup> and complex Zn<sub>2</sub> in CDCl<sub>3</sub>.

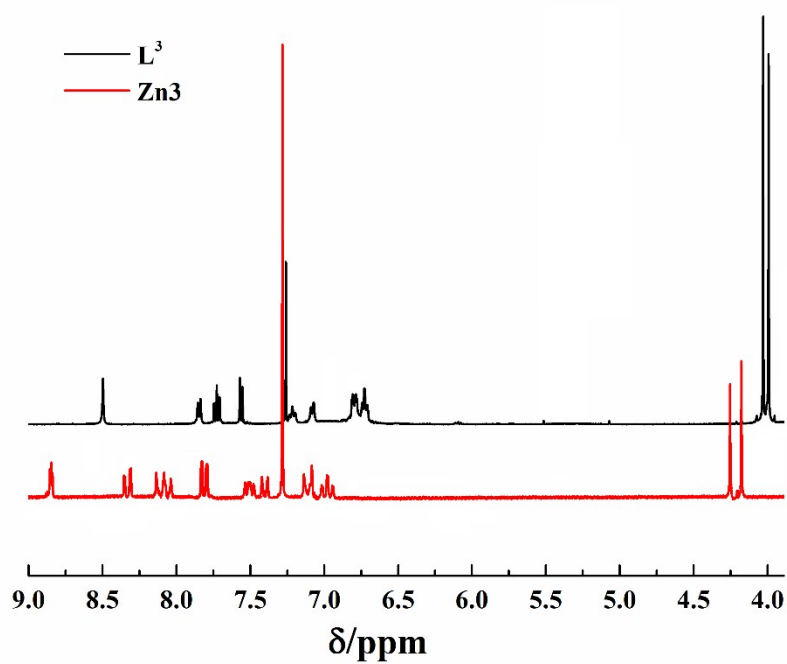

**Figure S8.** <sup>1</sup>H NMR spectra of the free ligand L<sup>3</sup> and complex Zn<sub>3</sub> in CDCl<sub>3</sub>.

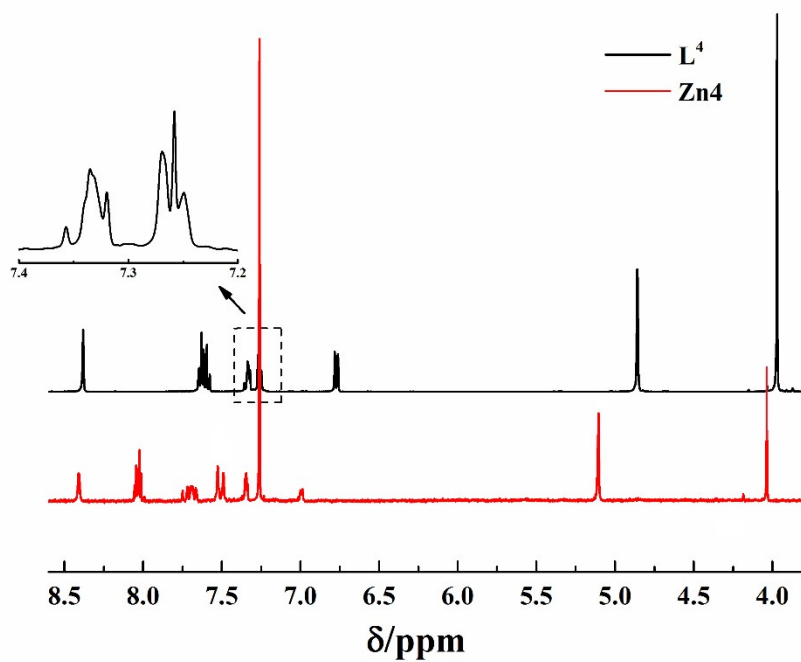

**Figure S9.** <sup>1</sup>H NMR spectra of the free ligand L<sup>4</sup> and complex Zn<sup>4</sup> in CDCl<sub>3</sub>.

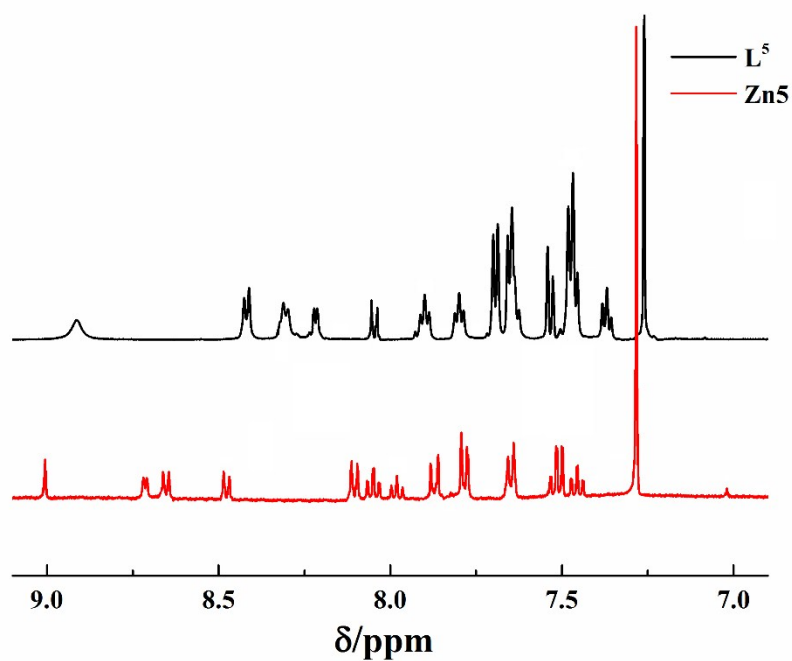

**Figure S10.** <sup>1</sup>H NMR spectra of the free ligand L<sup>5</sup> and complex Zn<sup>5</sup> in CDCl<sub>3</sub>.

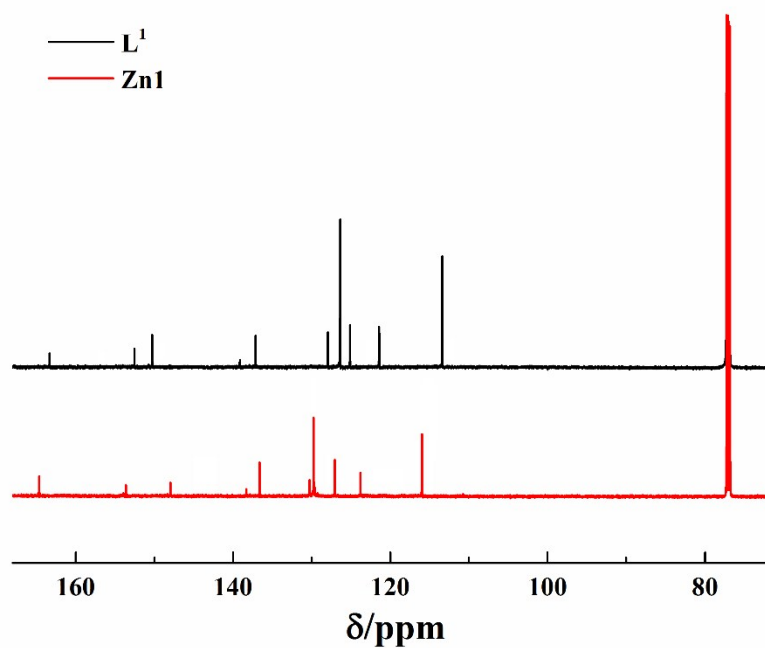

**Figure S11.** <sup>13</sup>C NMR spectra of the free ligand **L<sup>1</sup>** and complex **Zn1** in CDCl<sub>3</sub>.

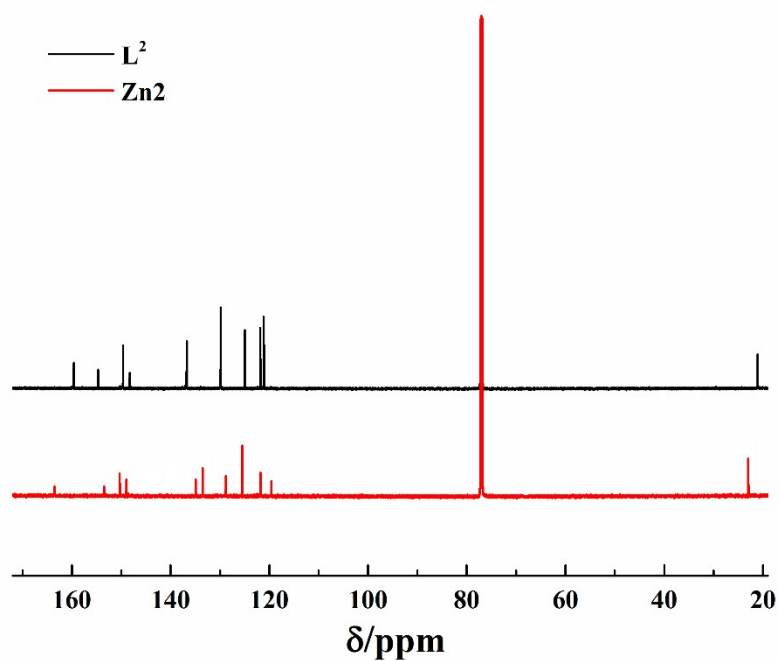

**Figure S12.** <sup>13</sup>C NMR spectra of the free ligand **L<sup>2</sup>** and complex **Zn2** in CDCl<sub>3</sub>.



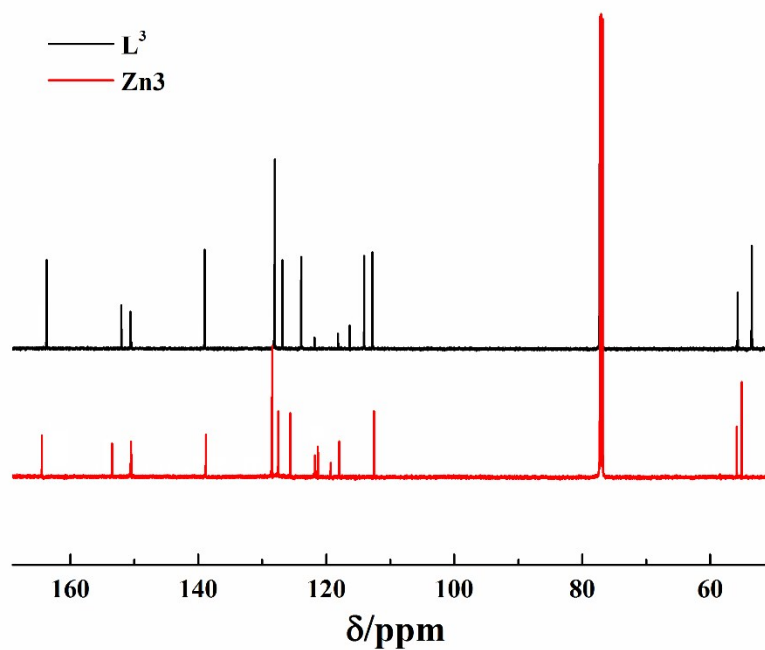

**Figure S13.**  $^{13}\text{C}$  NMR spectra of the free ligand  $\text{L}^3$  and complex  $\text{Zn3}$  in  $\text{CDCl}_3$ .

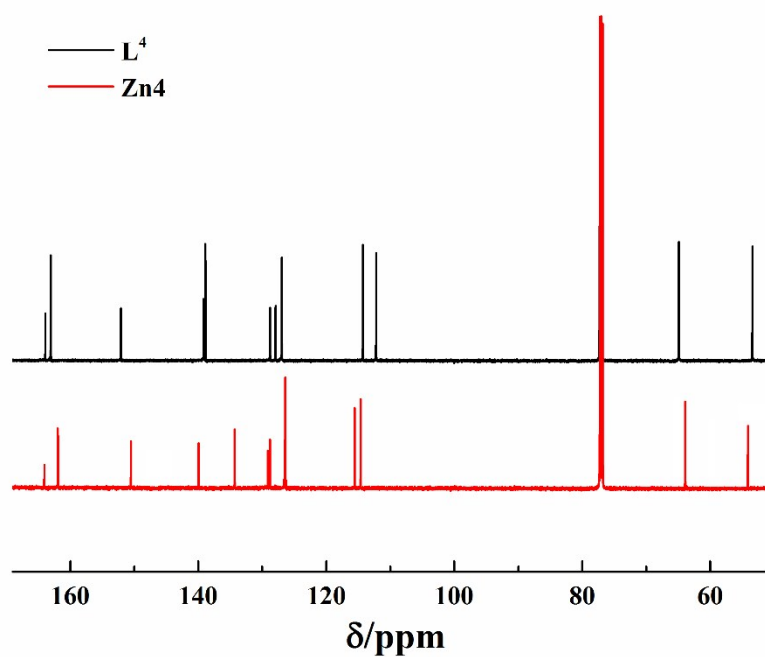

**Figure S14.**  $^{13}\text{C}$  NMR spectra of the free ligand  $\text{L}^4$  and complex  $\text{Zn4}$  in  $\text{CDCl}_3$ .

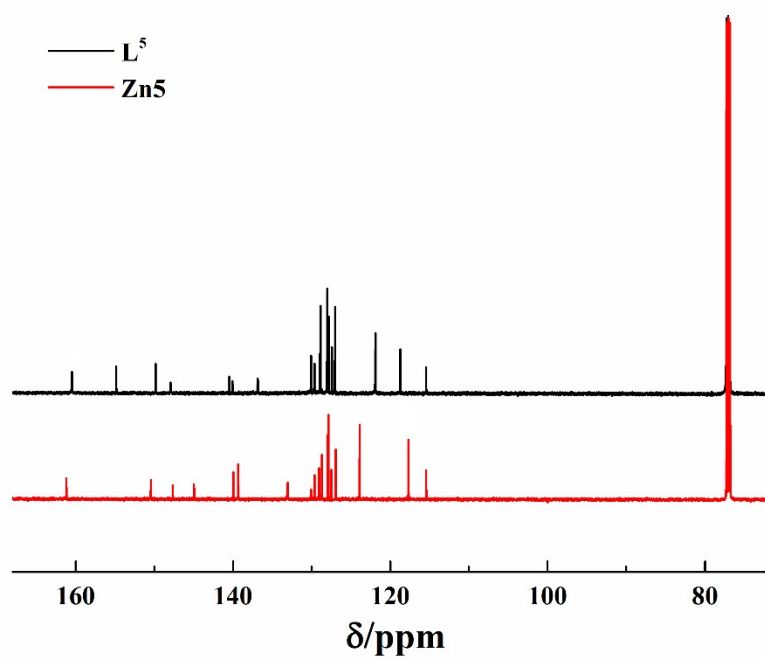

**Figure S15.**  $^{13}\text{C}$  NMR spectra of the free ligand  $\text{L}^5$  and complex  $\text{Zn5}$  in  $\text{CDCl}_3$ .

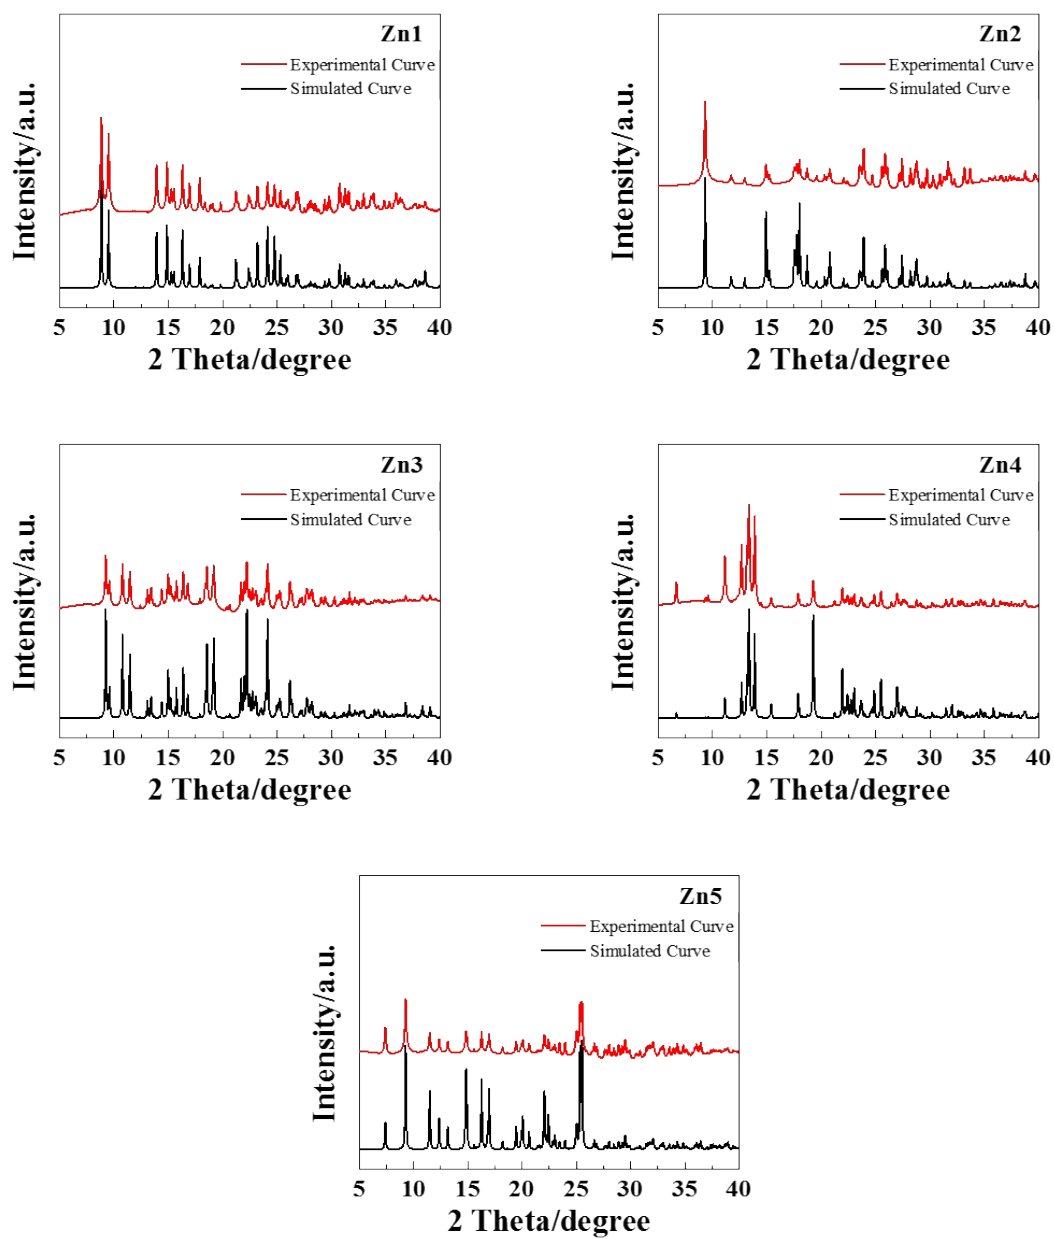

Figure S16. Experimental (top) and simulated (bottom) PXRD patterns of complexes **Zn1–Zn5**.

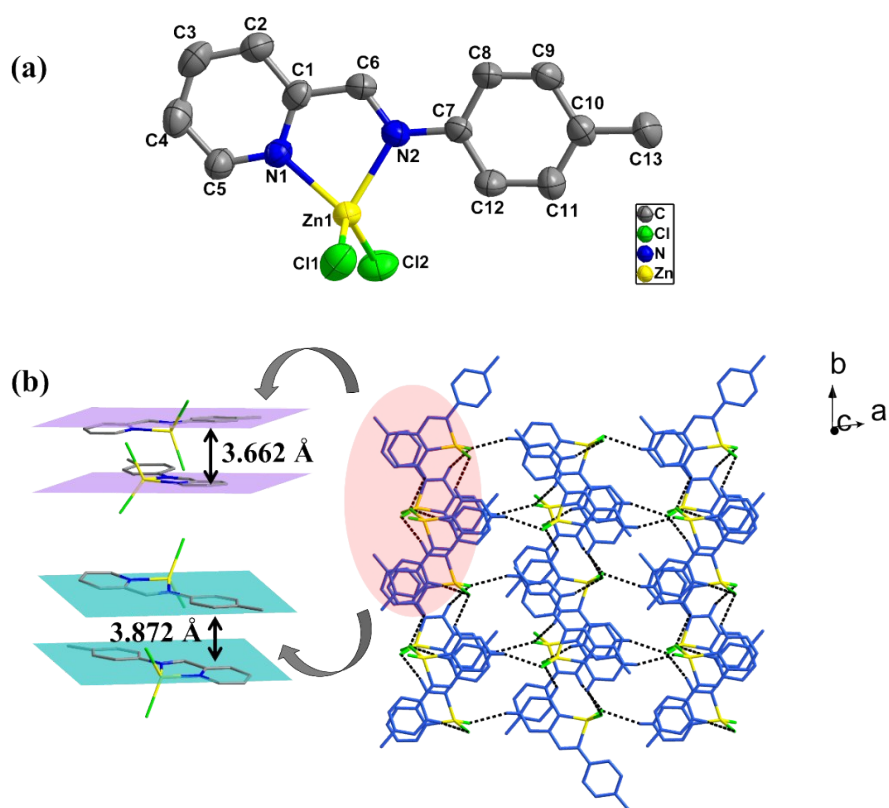

**Figure S17.** (a) Crystal structure of **Zn2**. Thermal ellipsoid is drawn at 50% probability. H atoms have been omitted for clarity. (b) The 3D network structure in **Zn2**. Dotted lines represent the C–H···Cl interactions.

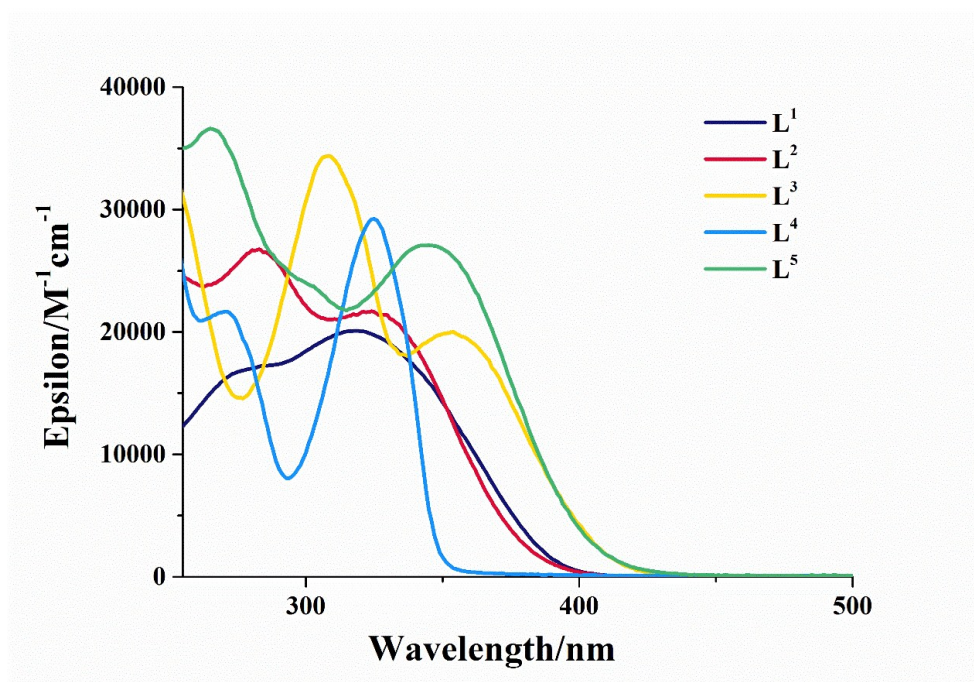

**Figure S18.** UV–vis absorption spectra of **L<sup>1</sup>–L<sup>5</sup>** in CH<sub>3</sub>CN at room temperature.

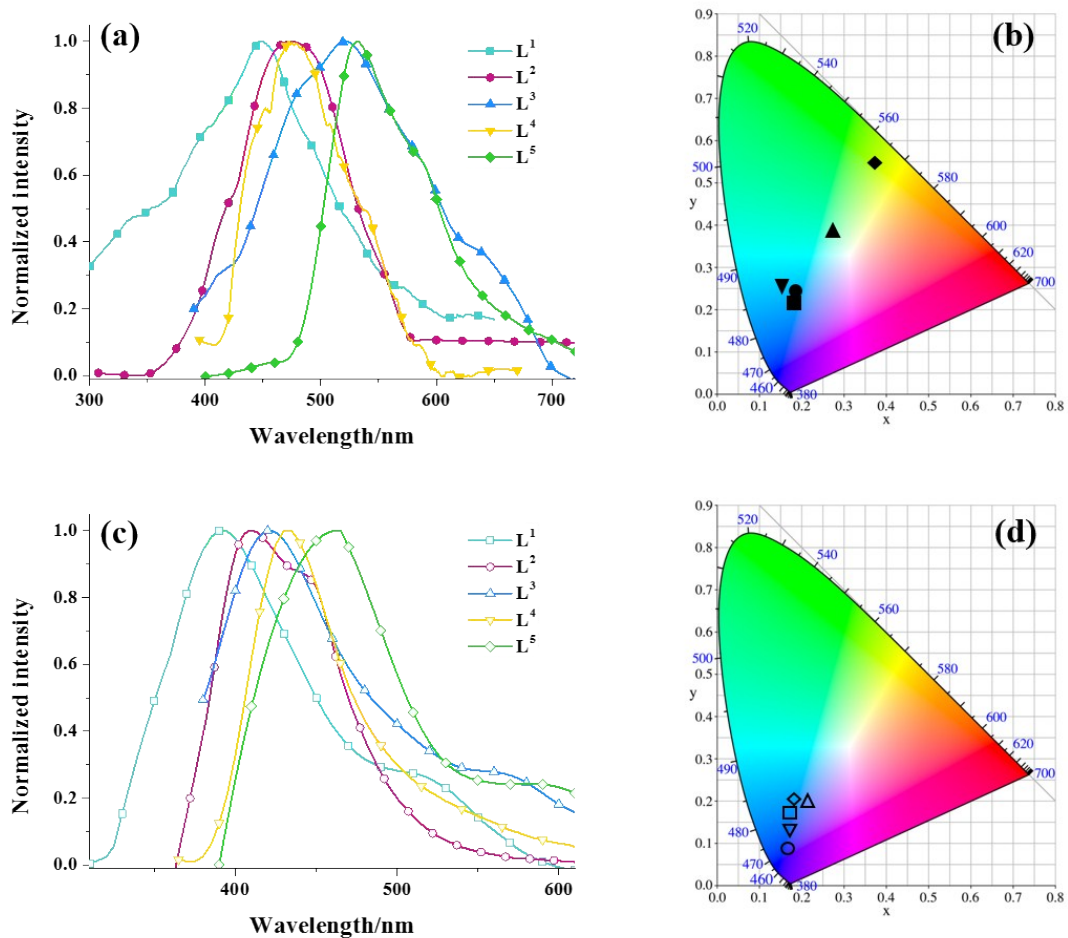

**Figure S19.** (a) Emission spectra of L<sup>1</sup>–L<sup>5</sup> in the solid state and (b) CIE chromaticity diagram (1931 CIE standard). (c) Emission spectra of L<sup>1</sup>–L<sup>5</sup> in acetonitrile solution and (d) CIE chromaticity diagram.

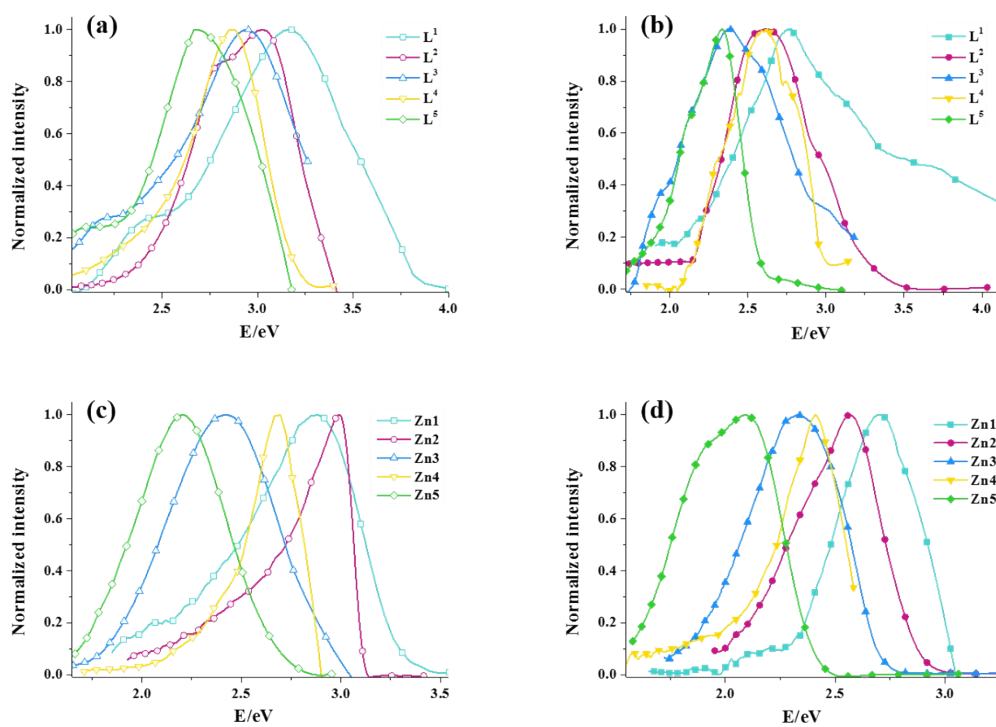

**Figure S20.** Emission energy spectra of  $L^1$ – $L^5$  in (a) acetonitrile solution and (b) the solid state. Emission energy spectra of  $Zn1$ – $Zn5$  in (c) acetonitrile solution and (d) the solid state.



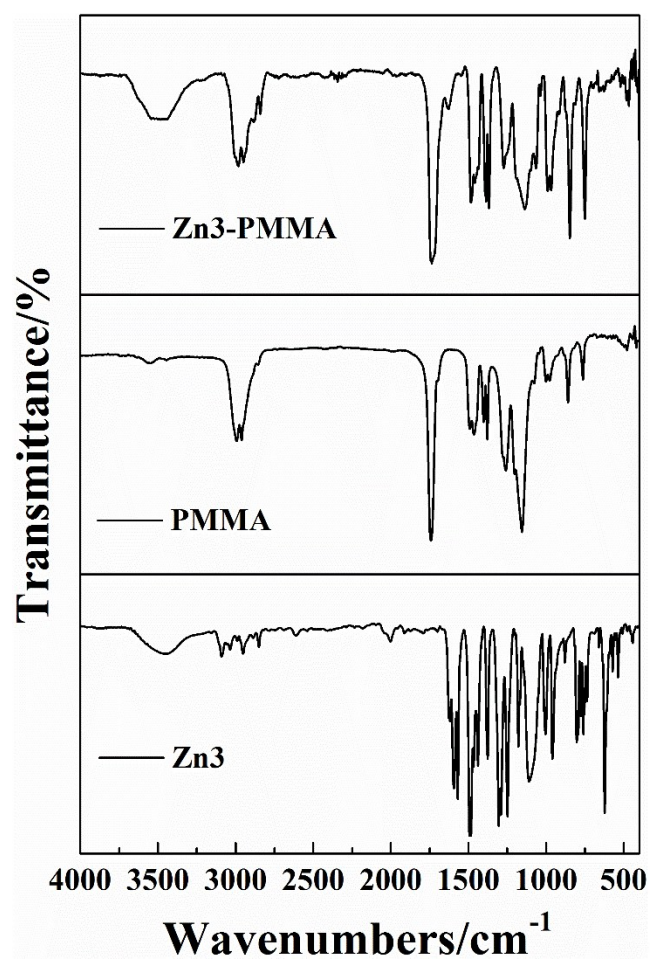

Figure S21. IR spectra of pure PMMA, Zn3 and Zn3-PMMA in KBr disks.

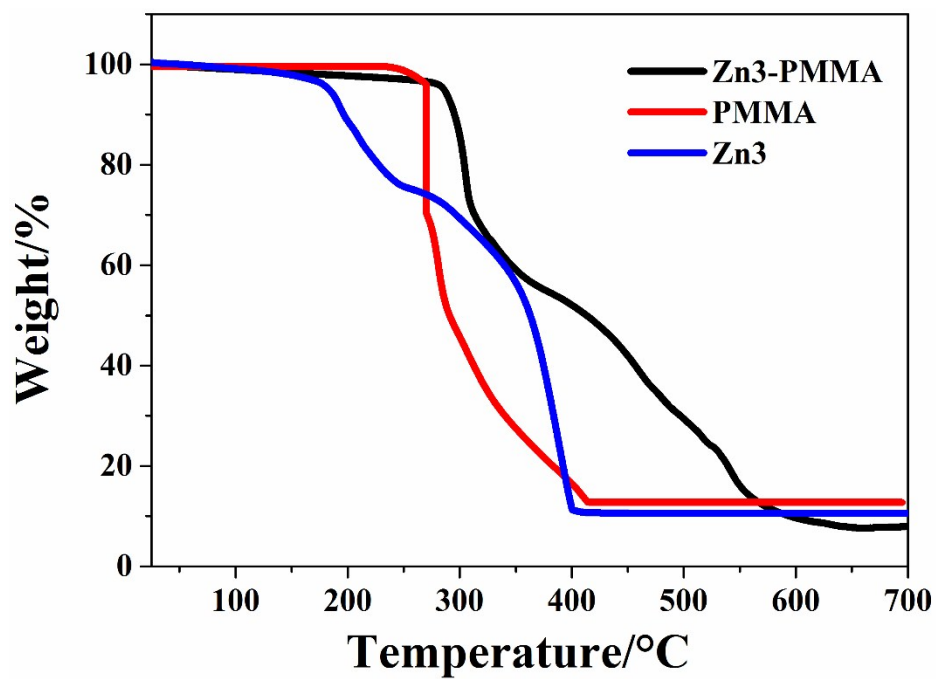

Figure S22. The comparison TG curves of pure PMMA, Zn3 and Zn3-PMMA.

**Table S1.** Selected bond distances (Å) and angles (°) for **Zn1** and **Zn2**.

| Parameter         | <b>Zn1</b> | <b>Zn2</b> |
|-------------------|------------|------------|
| Zn(1)-N(1)        | 2.0969(17) | 2.054(5)   |
| Zn(1)-N(2)        | 2.1935(17) | 2.092(5)   |
| Zn(1)-Cl(1)       | 2.2308(7)  | 2.203(2)   |
| Zn(1)-Cl(2)       | 2.3320(7)  | 2.194(2)   |
| N(2)-C(6)         | 1.279(2)   | 1.294(7)   |
| N(1)-Zn(1)-N(2)   | 77.84(6)   | 80.6(2)    |
| N(1)-Zn(1)-Cl(1)  | 108.91(5)  | 112.80(16) |
| N(2)-Zn(1)-Cl(1)  | 103.18(5)  | 110.94(15) |
| N(1)-Zn(1)-Cl(2)  | 132.87(5)  | 116.57(15) |
| N(2)-Zn(1)-Cl(2)  | 90.62(4)   | 111.54(14) |
| Cl(1)-Zn(1)-Cl(2) | 118.22(3)  | 118.25(8)  |
| C(5)-N(1)-Zn(1)   | 128.03(15) | 128.7(5)   |
| C(1)-N(1)-Zn(1)   | 114.26(12) | 112.5(4)   |
| C(6)-N(2)-Zn(1)   | 112.17(14) | 111.4(4)   |
| C(7)-N(2)-Zn(1)   | 127.88(12) | 125.0(4)   |

**Table S2.** Selected bond distances (Å) and angles (°) for **Zn3–Zn5**.

| <b>Zn3</b>      |            |                  |            |
|-----------------|------------|------------------|------------|
| Parameter       |            | Parameter        |            |
| Zn(1)-N(1)      | 2.062(6)   | N(4)-Zn(1)-O(2)  | 86.93(19)  |
| Zn(1)-N(2)      | 2.075(6)   | N(1)-Zn(1)-O(2)  | 147.2(2)   |
| Zn(1)-N(3)      | 2.088(5)   | N(2)-Zn(1)-O(2)  | 70.3(2)    |
| Zn(1)-N(4)      | 2.053(5)   | N(3)-Zn(1)-O(2)  | 101.81(19) |
| Zn(1)-O(2)      | 2.471(5)   | O(4)-Zn(1)-O(2)  | 79.41(17)  |
| Zn(1)-O(4)      | 2.316(4)   | C(9)-O(2)-Zn(1)  | 110.5(4)   |
| N(2)-C(6)       | 1.255(9)   | C(14)-O(2)-Zn(1) | 132.5(5)   |
| N(4)-C(20)      | 1.286(8)   | C(23)-O(4)-Zn(1) | 114.3(4)   |
| N(4)-Zn(1)-N(1) | 120.0(2)   | C(28)-O(4)-Zn(1) | 126.0(4)   |
| N(4)-Zn(1)-N(2) | 156.3(2)   | C(5)-N(1)-Zn(1)  | 128.6(6)   |
| N(1)-Zn(1)-N(2) | 79.8(2)    | C(1)-N(1)-Zn(1)  | 113.9(5)   |
| N(4)-Zn(1)-N(3) | 79.72(19)  | C(6)-N(2)-Zn(1)  | 114.1(5)   |
| N(1)-Zn(1)-N(3) | 101.3(2)   | C(8)-N(2)-Zn(1)  | 122.8(5)   |
| N(2)-Zn(1)-N(3) | 110.7(2)   | C(19)-N(3)-Zn(1) | 128.5(5)   |
| N(4)-Zn(1)-O(4) | 72.55(17)  | C(15)-N(3)-Zn(1) | 112.5(4)   |
| N(1)-Zn(1)-O(4) | 90.7(2)    | C(20)-N(4)-Zn(1) | 114.2(4)   |
| N(2)-Zn(1)-O(4) | 95.98(19)  | C(22)-N(4)-Zn(1) | 122.5(4)   |
| N(3)-Zn(1)-O(4) | 152.17(19) |                  |            |

  

| <b>Zn4</b> |          |            |          |
|------------|----------|------------|----------|
| Parameter  |          | Parameter  |          |
| Zn(1)-N(1) | 2.065(6) | Zn(2)-N(2) | 2.073(6) |
| Zn(1)-N(3) | 2.078(6) | Zn(2)-N(4) | 2.071(6) |

|                   |            |                   |            |
|-------------------|------------|-------------------|------------|
| Zn(1)-Cl(1)       | 2.218(2)   | Zn(2)-Cl(3)       | 2.185(2)   |
| Zn(1)-Cl(2)       | 2.196(2)   | Zn(2)-Cl(4)       | 2.203(2)   |
| N(3)-C(6)         | 1.262(9)   | N(4)-C(13)        | 1.259(10)  |
| N(1)-Zn(1)-N(3)   | 80.3(3)    | N(2)-Zn(2)-N(4)   | 79.9(3)    |
| N(1)-Zn(1)-Cl(1)  | 106.95(17) | N(2)-Zn(2)-Cl(3)  | 114.59(18) |
| N(3)-Zn(1)-Cl(1)  | 113.3(2)   | N(4)-Zn(2)-Cl(3)  | 120.42(18) |
| N(1)-Zn(1)-Cl(2)  | 115.90(19) | N(2)-Zn(2)-Cl(4)  | 112.73(16) |
| N(3)-Zn(1)-Cl(2)  | 114.15(19) | N(4)-Zn(2)-Cl(4)  | 105.21(19) |
| Cl(2)-Zn(1)-Cl(1) | 119.61(9)  | Cl(3)-Zn(2)-Cl(4) | 117.94(9)  |
| C(5)-N(1)-Zn(1)   | 129.2(6)   | C(12)-N(2)-Zn(2)  | 129.4(5)   |
| C(1)-N(1)-Zn(1)   | 111.9(5)   | C(8)-N(2)-Zn(2)   | 111.9(5)   |
| C(6)-N(3)-Zn(1)   | 112.0(6)   | C(13)-N(4)-Zn(2)  | 113.1(6)   |
| C(21)-N(3)-Zn(1)  | 129.2(6)   | C(22)-N(4)-Zn(2)  | 127.2(6)   |

---

**Zn5**

| Parameter        |            | Parameter         |           |
|------------------|------------|-------------------|-----------|
| Zn(1)-N(1)       | 2.070(3)   | N(1)-Zn(1)-Cl(2)  | 112.38(9) |
| Zn(1)-N(2)       | 2.093(3)   | N(2)-Zn(1)-Cl(2)  | 108.08(9) |
| Zn(1)-Cl(1)      | 2.1779(11) | Cl(1)-Zn(1)-Cl(2) | 118.11(5) |
| Zn(1)-Cl(2)      | 2.2154(12) | C(5)-N(1)-Zn(1)   | 129.8(3)  |
| N(2)-C(10)       | 1.268(5)   | C(1)-N(1)-Zn(1)   | 111.5(3)  |
| N(1)-Zn(1)-N(2)  | 80.71(13)  | C(10)-N(2)-Zn(1)  | 110.9(3)  |
| N(1)-Zn(1)-Cl(1) | 116.68(9)  | C(11)-N(2)-Zn(1)  | 126.0(3)  |
| N(2)-Zn(1)-Cl(1) | 114.81(9)  |                   |           |

**Table S3.** Analytical and physical data of the ligands **L<sup>1</sup>–L<sup>5</sup>** and complexes **Zn1–Zn5**.

| Complex              | Color     | Yield (%) | Found (Calcd.) (%) |             |               | M.p. (°C)   |
|----------------------|-----------|-----------|--------------------|-------------|---------------|-------------|
|                      |           |           | C                  | H           | N             |             |
| <b>L<sup>1</sup></b> | Yellow    | 67        | 63.38 (63.43)      | 3.41 (3.99) | 18.45 (18.49) | 130.2–131.5 |
| <b>Zn1</b>           | Yellow    | 58        | 39.72 (39.65)      | 2.61 (2.50) | 11.58 (11.56) | —           |
| <b>L<sup>2</sup></b> | Yellow    | 90        | 79.55 (79.56)      | 6.17 (6.16) | 14.28 (14.27) | 67.5–68.7   |
| <b>Zn2</b>           | Colorless | 65        | 47.01 (46.96)      | 3.57 (3.64) | 8.40 (8.42)   | —           |
| <b>L<sup>3</sup></b> | Yellow    | 89        | 69.17 (69.41)      | 5.99 (5.82) | 11.38 (11.56) | 55.0–56.3   |
| <b>Zn3</b>           | Yellow    | 72        | 44.88 (44.91)      | 3.81 (3.77) | 7.43 (7.48)   | —           |
| <b>L<sup>4</sup></b> | Cream     | 80        | 70.68 (70.57)      | 5.94 (5.92) | 14.88 (14.96) | 74.6–75.6   |
| <b>Zn4</b>           | Colorless | 67        | 40.85 (40.84)      | 3.47 (3.43) | 8.59 (8.66)   | —           |
| <b>L<sup>5</sup></b> | Yellow    | 74        | 85.75 (85.69)      | 5.28 (5.23) | 9.05 (9.08)   | 125.1–126.8 |
| <b>Zn5</b>           | Yellow    | 59        | 59.37 (59.43)      | 3.66 (3.63) | 6.25 (6.30)   | —           |

**Table S4.** The emission energy data of the ligands **L<sup>1</sup>–L<sup>5</sup>** and complexes **Zn1–Zn5** in acetonitrile solution and the solid state at room temperature.

| Complex              | in acetonitrile solution | in the solid state       | $\Delta E_{(\text{aq-solid})}^a$ (eV) |
|----------------------|--------------------------|--------------------------|---------------------------------------|
|                      | $E_{\text{max em}}$ (eV) | $E_{\text{max em}}$ (eV) |                                       |
| <b>L<sup>1</sup></b> | 3.18                     | 2.78                     | 0.40                                  |
| <b>Zn1</b>           | 2.88                     | 2.69                     | 0.19                                  |
| <b>L<sup>2</sup></b> | 3.02                     | 2.62                     | 0.40                                  |
| <b>Zn2</b>           | 2.99                     | 2.57                     | 0.42                                  |
| <b>L<sup>3</sup></b> | 2.95                     | 2.38                     | 0.57                                  |
| <b>Zn3</b>           | 2.41                     | 2.33                     | 0.08                                  |
| <b>L<sup>4</sup></b> | 2.88                     | 2.63                     | 0.25                                  |
| <b>Zn4</b>           | 2.70                     | 2.41                     | 0.29                                  |
| <b>L<sup>5</sup></b> | 2.67                     | 2.34                     | 0.33                                  |
| <b>Zn5</b>           | 2.21                     | 2.09                     | 0.12                                  |

<sup>a</sup>  $\Delta E_{(\text{aq-solid})}$  represents the maximum emission energy difference between the compound in acetonitrile solution and the solid state.

**Table S5.** The luminescence lifetimes of the ligands **L<sup>1</sup>–L<sup>5</sup>** and complexes **Zn1–Zn5** in acetonitrile solution and the solid state at room temperature.

| Complex              | $\tau_1$ ( $\mu\text{s}$ ) | $A_1$ (%) | $\tau_2$ ( $\mu\text{s}$ ) | $A_2$ (%) | $\tau^a$ ( $\mu\text{s}$ ) | Conditions         |
|----------------------|----------------------------|-----------|----------------------------|-----------|----------------------------|--------------------|
| <b>L<sup>1</sup></b> | 0.84                       | 81.22     | 6.83                       | 18.78     | 4.75                       | CH <sub>3</sub> CN |
|                      | 1.28                       | 51.55     | 8.81                       | 48.45     | 7.80                       | solid              |
| <b>Zn1</b>           | 0.90                       | 60.97     | 8.68                       | 39.03     | 7.60                       | CH <sub>3</sub> CN |
|                      | 1.22                       | 54.54     | 8.99                       | 45.46     | 7.90                       | solid              |
| <b>L<sup>2</sup></b> | 0.92                       | 75.68     | 7.39                       | 24.32     | 5.58                       | CH <sub>3</sub> CN |
|                      | 1.29                       | 54.70     | 8.84                       | 45.30     | 7.71                       | solid              |
| <b>Zn2</b>           | 1.10                       | 48.21     | 8.75                       | 51.79     | 7.95                       | CH <sub>3</sub> CN |
|                      | 0.95                       | 59.21     | 10.52                      | 40.79     | 9.41                       | solid              |
| <b>L<sup>3</sup></b> | 1.01                       | 72.32     | 6.84                       | 27.68     | 5.22                       | CH <sub>3</sub> CN |
|                      | 3.15                       | 45.48     | 14.82                      | 54.52     | 13.06                      | solid              |
| <b>Zn3</b>           | 1.09                       | 63.22     | 10.19                      | 36.78     | 8.78                       | CH <sub>3</sub> CN |
|                      | 1.45                       | 56.51     | 16.12                      | 43.49     | 14.58                      | solid              |
| <b>L<sup>4</sup></b> | 0.99                       | 48.32     | 8.21                       | 51.68     | 7.48                       | CH <sub>3</sub> CN |
|                      | 1.05                       | 61.08     | 9.22                       | 38.92     | 7.98                       | solid              |
| <b>Zn4</b>           | 1.06                       | 53.16     | 8.96                       | 46.84     | 8.02                       | CH <sub>3</sub> CN |
|                      | 1.24                       | 48.48     | 11.00                      | 51.52     | 10.06                      | solid              |
| <b>L<sup>5</sup></b> | 0.87                       | 61.32     | 7.71                       | 38.68     | 6.67                       | CH <sub>3</sub> CN |
|                      | 0.83                       | 49.92     | 8.71                       | 50.08     | 8.03                       | solid              |
| <b>Zn5</b>           | 0.95                       | 49.68     | 9.26                       | 50.32     | 8.50                       | CH <sub>3</sub> CN |
|                      | 0.86                       | 56.78     | 10.31                      | 43.22     | 9.38                       | solid              |

$$^a \tau = \frac{\tau_1^2 A_1 \% + \tau_2^2 A_2 \%}{\tau_1 A_1 \% + \tau_2 A_2 \%}$$
